# Supplementary material for: Modelled estimates of spatial variability of iron stress in the Atlantic sector of the Southern Ocean
Source: Copernicus journal article supplement (doi:10.5194/bg-2017-74), 2017-03-07
Supplement: Supplementary file 1 [file bg-2017-74-supplement.pdf]

# Modelled estimates of spatial variability of iron stress in the Atlantic sector of the Southern Ocean

Thomas J. Ryan-Keogh<sup>1,2</sup>, Sandy J. Thomalla<sup>1</sup>, Thato N. Mtshali<sup>1</sup>, Hazel Little<sup>2</sup>

## Supplementary Information

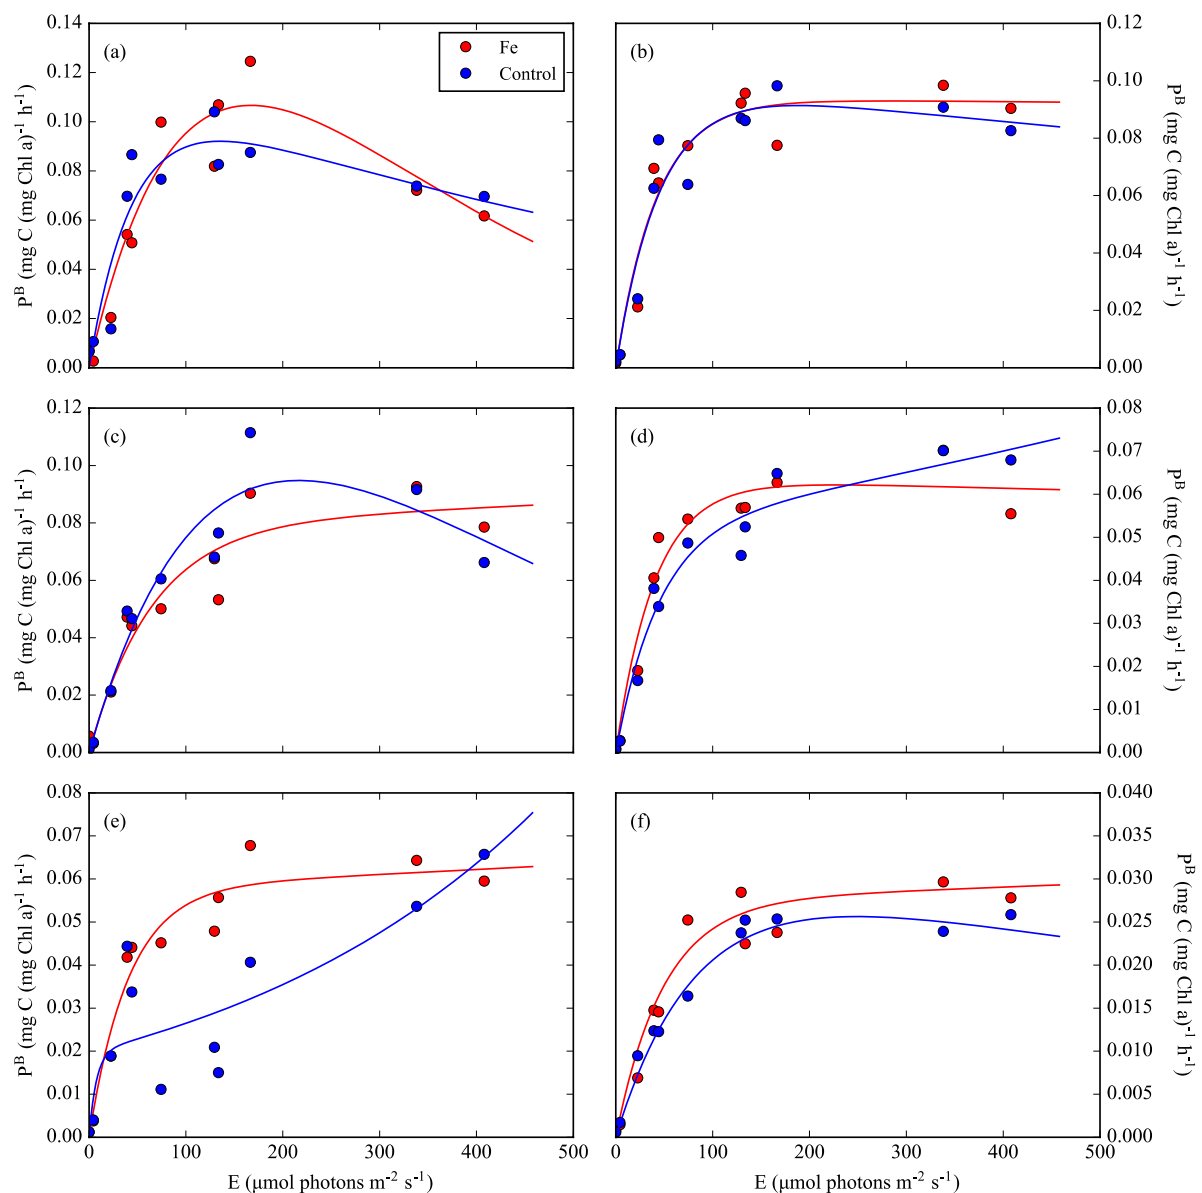

Figure S1: PE curves of productivity ( $\text{mg C (mg Chl a)}^{-1} \text{h}^{-1}$ ) with (Fe, red dots) and without (Control, blue dots) the addition of iron for experiments (a) 1, (b) 2, (c) 3, (d) 4, (e) 5 and (f) 6; lines represent a non-linear least squares fit to the equation of Platt et al. (1980).

Figure S2

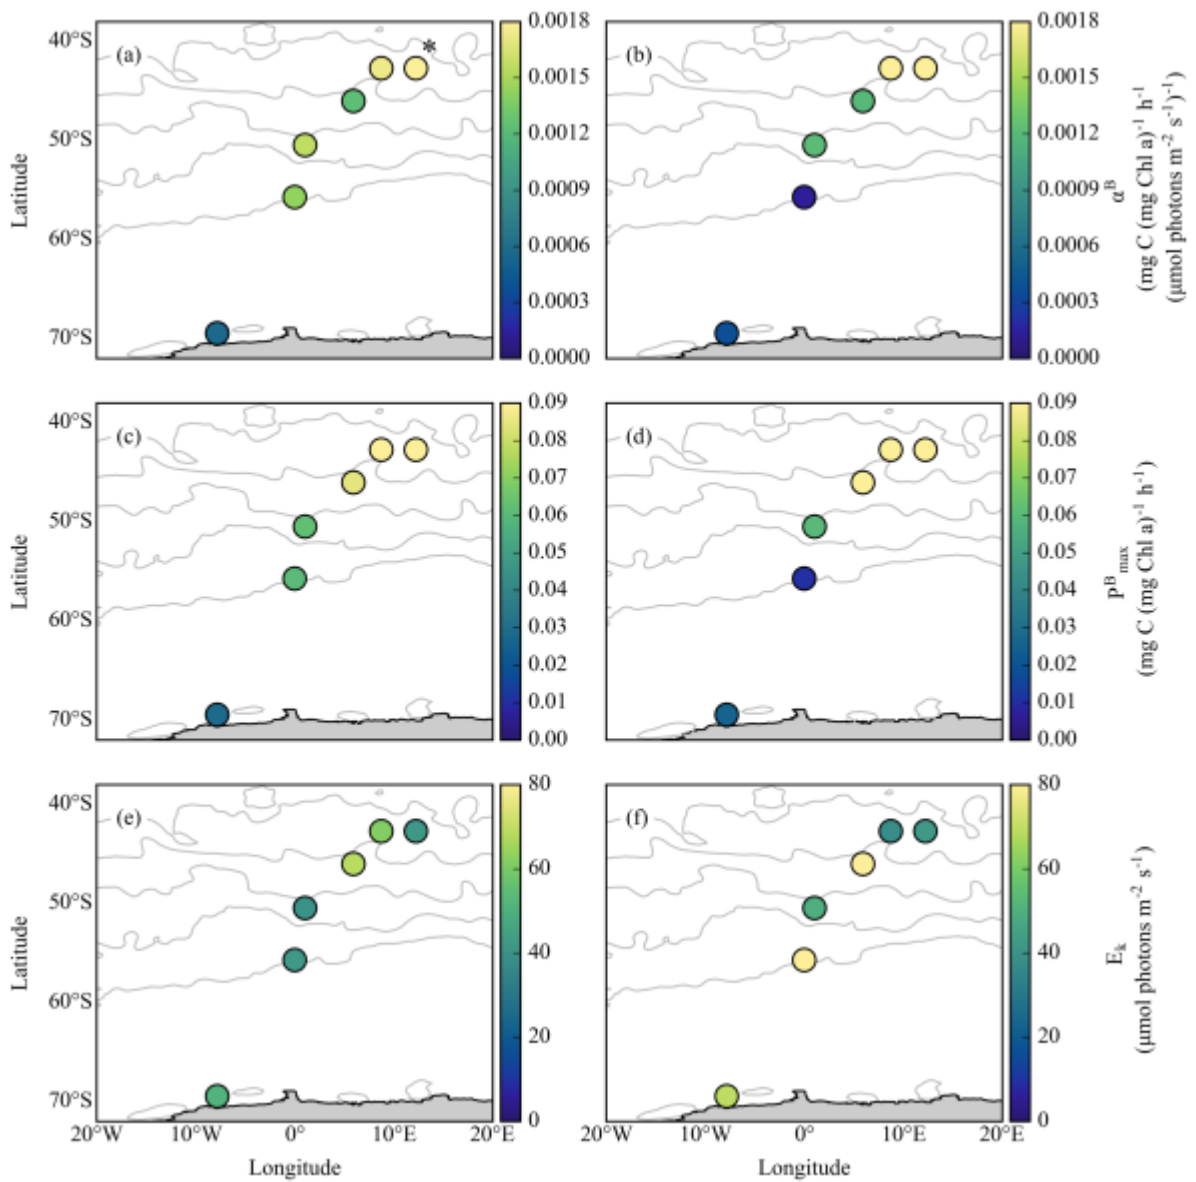

Figure S2: PE parameters (a)  $\alpha^B$  (mg C (mg Chl a)<sup>-1</sup> h<sup>-1</sup> (μmol photons m<sup>-2</sup> s<sup>-1</sup>)<sup>-1</sup>), (b)  $P^B_{max}$  (mg C (mg Chl a)<sup>-1</sup> h<sup>-1</sup>) and (c)  $E_k$  (μmol photons m<sup>-2</sup> s<sup>-1</sup>) for the iron addition and control treatments of experiments set up in the Atlantic sector of the Southern Ocean.

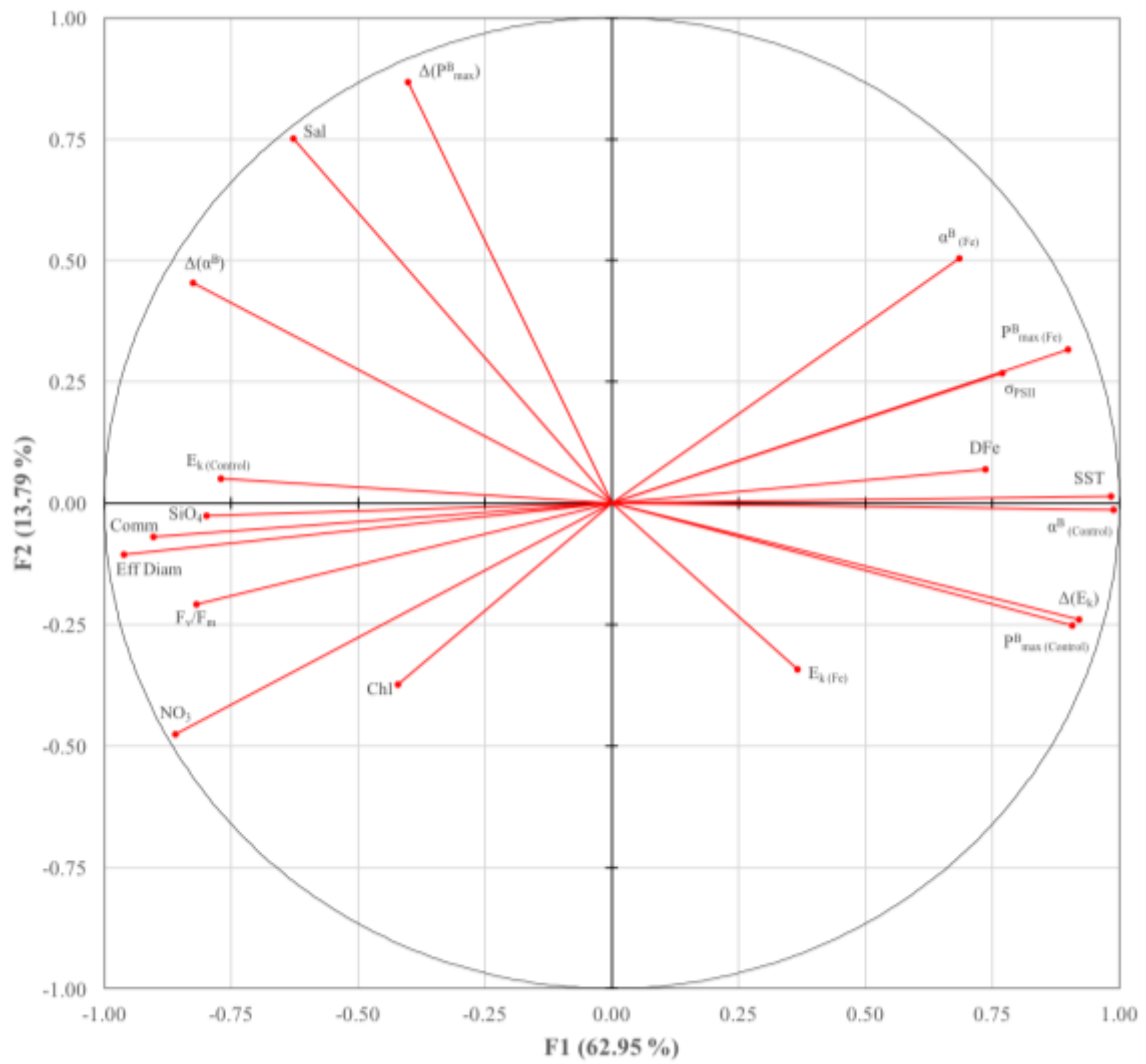

Figure S3: PCA: projection of the photosynthetic parameters determined experimentally and *in situ* variables measured, including:  $\alpha^B$ ,  $P^B_{max}$  and  $E_k$  from the both Fe and control treatments, the relative differences, sea surface temperature (SST), Salinity, Nitrate, Silicate and dissolved Iron concentration, Chl concentration, Effective Diameter,  $F_v/F_m$ ,  $\sigma_{PSII}$  and Community composition (ratio of Diatoms to Haptophytes).

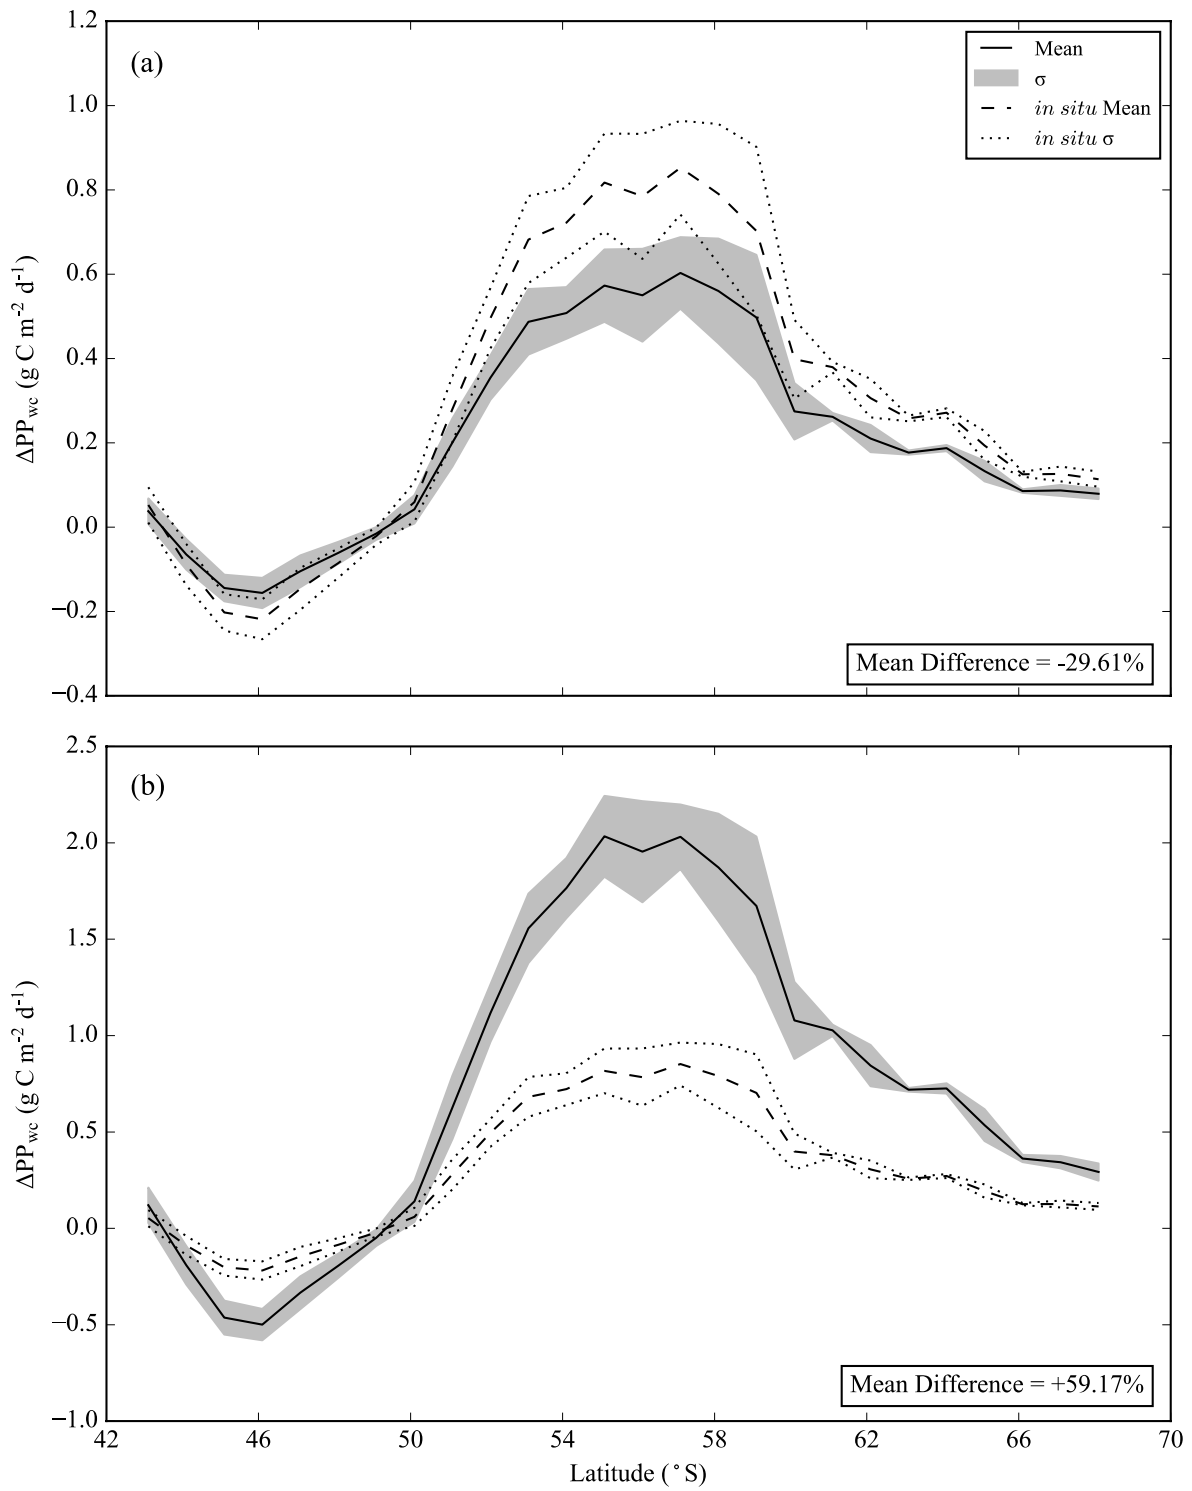

**Figure S4: The absolute mean differences in depth integrated primary production ( $\Delta PP_{we}$ ) with  $\pm$  standard deviation ( $\sigma$ ) interpolated along the transect line utilizing the (a) increased  $K_d$  values and (b) decreased  $K_d$  values; also displayed is  $PP_{we}$  derived utilizing *in situ*  $K_d$ .**

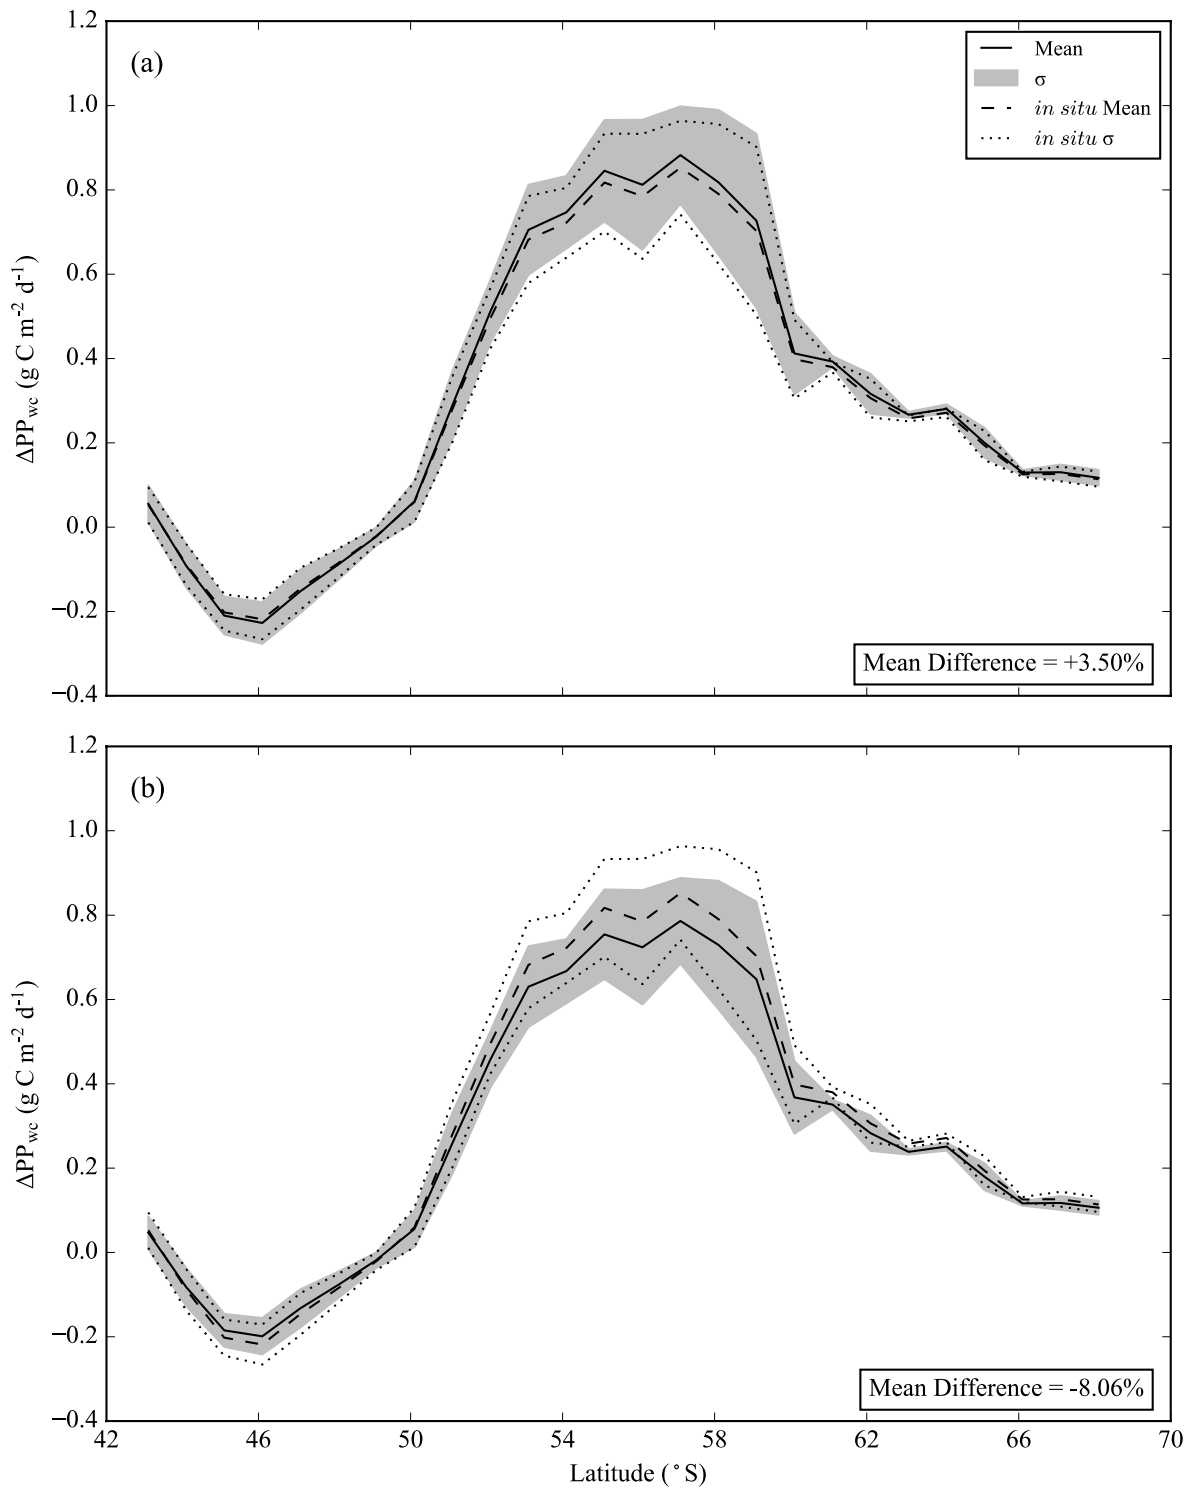

**Figure S5: The absolute mean differences in depth integrated primary production ( $\Delta PP_{wc}$ ) with  $\pm$  standard deviation ( $\sigma$ ) interpolated along the transect line utilizing the (a) increased PAR values and (b) decreased PAR values; also displayed is  $PP_{wc}$  derived utilizing *in situ* PAR.**

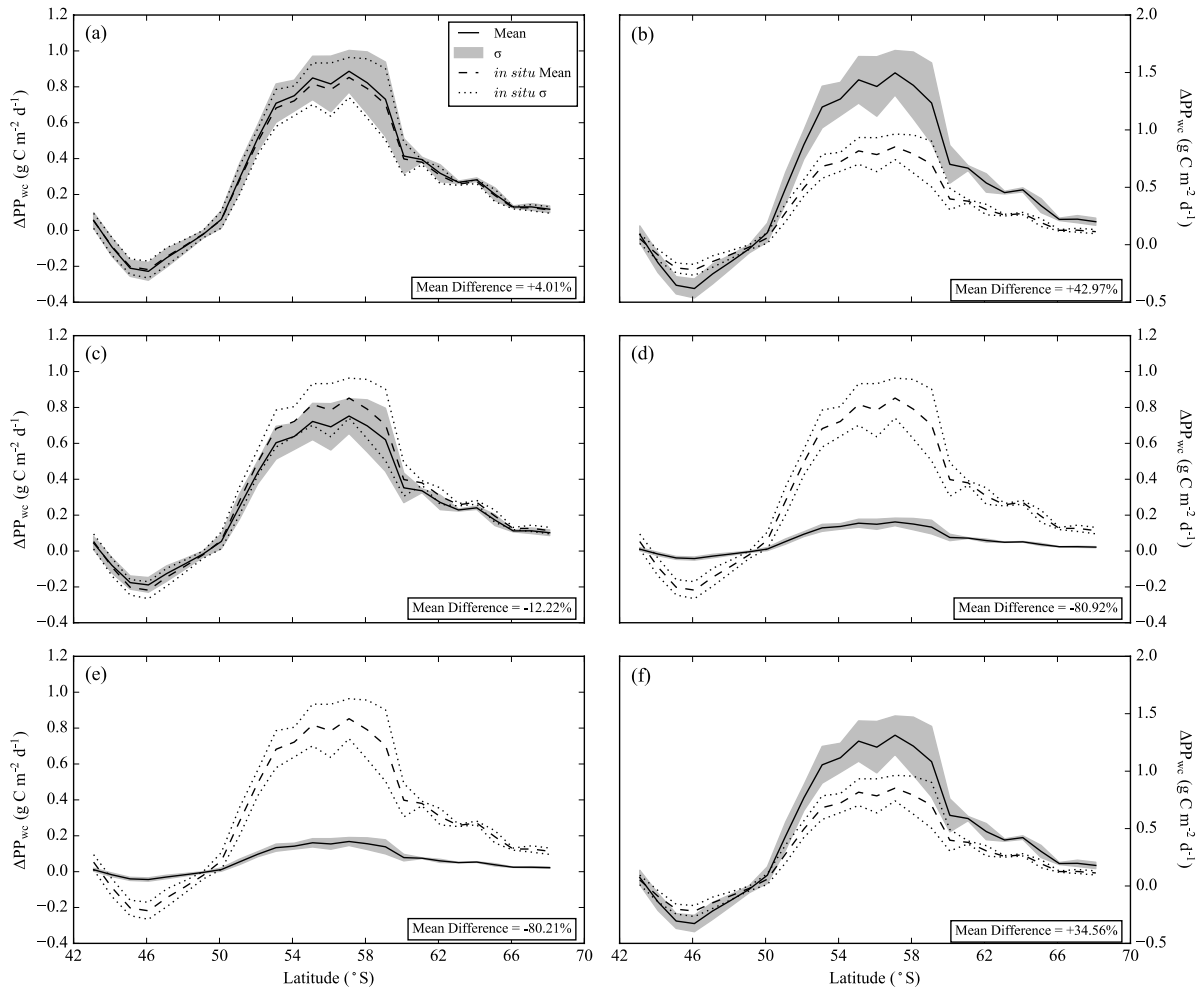

**Figure S6:** The absolute mean differences in depth integrated primary production ( $\Delta PP_{wc}$ ) with  $\pm$  standard deviation ( $\sigma$ ) interpolated along the transect line utilizing increased (a)  $\alpha$  values and (b)  $P_{max}$  values, decreased (c)  $\alpha$  values and (d)  $P_{max}$  values, (e) increase  $\alpha$  and decreased  $P_{max}$  values and (f) decreased  $\alpha$  and increased  $P_{max}$  values. Displayed on all plots is the  $PP_{wc}$  derived utilizing the *in situ*  $\alpha$  and  $P_{max}$  values. (Please note the different scales in subplots b & f).
